# Supplementary material for: Diagnostic Performance of Cortical Lesions and the Central Vein Sign in Multiple Sclerosis
Source: PubMed Central journal article supplement (PMC10714285; doi:10.1001/jamaneurol.2023.4737), 2023-12-11
Supplement: jamaneurol-e234737-s002.pdf [file jamaneurol-e234737-s002.pdf]

\*First name, last name, and suffix (if applicable) are required and will appear in PubMed.

| <b>*Group Name(s): Magnetic Resonance Imaging in MS (MAGNIMS) Study Group</b> |                   |                              |                         |                                                                                                                                                                           |                                                 |                                                                |                                                                                                   |
|-------------------------------------------------------------------------------|-------------------|------------------------------|-------------------------|---------------------------------------------------------------------------------------------------------------------------------------------------------------------------|-------------------------------------------------|----------------------------------------------------------------|---------------------------------------------------------------------------------------------------|
| <b>*First Name and Middle Initial(s)</b>                                      | <b>*Last Name</b> | <b>*Suffix (eg, Jr, III)</b> | <b>Academic Degrees</b> | <b>Institution</b>                                                                                                                                                        | <b>Location (city, state/province, country)</b> | <b>Role or Contribution, eg, chair, principal investigator</b> | <b>Group (if more than 1 Group listed in the byline) and/or Subgroup (eg, Steering Committee)</b> |
| Jaume                                                                         | Sastre-Garriga    |                              | MD, PhD                 | Multiple Sclerosis Centre of Catalonia, Department of Neurology/Neuroimmunology, Hospital Universitari Vall d'Hebron, Universitat Autònoma de Barcelona, Barcelona, Spain | Barcelona, Spain                                | Co-chair of the MAGNIMS Steering Committee                     | MAGNIMS Steering Committee                                                                        |
| Claudio                                                                       | Gasparini         |                              | MD                      | Department of Neurology, San Camillo-Forlanini Hospital, Rome, Italy                                                                                                      | Rome, Italy                                     | Member of the MAGNIMS Steering Committee                       | MAGNIMS Steering Committee                                                                        |
| Hugo                                                                          | Vrenken           |                              | PhD                     | MS Center Amsterdam, Radiology and Nuclear Medicine, Vrije Universiteit Amsterdam, Amsterdam Neuroscience, Amsterdam UMC Location VUmc, Amsterdam, The Netherlands        | Amsterdam, The Netherlands                      | Member of the MAGNIMS Steering Committee                       | MAGNIMS Steering Committee                                                                        |
| Tarek                                                                         | Yousry            |                              | MD                      | Lysholm Department of Neuroradiology, UCLH National Hospital for Neurology and Neurosurgery, Neuroradiological Academic Unit, UCL Institute of Neurology, London, UK      | London, UK                                      | Member of the MAGNIMS Steering Committee                       | MAGNIMS Steering Committee                                                                        |
